# Supplementary material for: Blended Psychological Therapy for the Treatment of Psychological Disorders in Adult Patients: Systematic Review and Meta-Analysis
Source: PubMed Central journal article supplement (PMC11558224; doi:10.2196/49660), 2024-10-29
Supplement: ijmr_v13i1e49660_app2.pdf [file ijmr_v13i1e49660_app2.pdf]

## Database searches examples

### CINAHL

[← Back](#)

**Folder List**

Name of Search/Alert:

Description:

Date Created:

Databases:

Search Strategy:

Interface:

Save Search As:  Saved Search (Permanent)  
 Saved Search (Temporary, 24 hours)  
 Alert

**Search History**

| #  | Query                                  | Limiters/Expanders                                                                                                                                                                                                                                | Last Run Via                                                                                              |
|----|----------------------------------------|---------------------------------------------------------------------------------------------------------------------------------------------------------------------------------------------------------------------------------------------------|-----------------------------------------------------------------------------------------------------------|
| S1 | blended OR ( online and face to face ) | Limiters - Published Date: 20220501-20230231; English Language; Age Groups: Adult: 19-44 years, Middle Aged: 45-64 years, Aged: 65+ years, Aged, 80 and over, All Adult<br>Expanders - Apply equivalent subjects<br>Search modes - Boolean/Phrase | Interface - EBSCOhost Research Databases<br>Search Screen - Advanced Search<br>Database - CINAHL Complete |

[Top of Page](#)

[EBSCO Connect](#) | [Privacy Policy](#) | [A/B Testing](#) | [Terms of Use](#) | [Copyright](#) | [Cookie Policy](#) | [Manage](#)

© 2023 EBSCO Industries, Inc. All rights reserved.

### EMBASE

| Set | Search Statement                                                                                                                                                                           |
|-----|--------------------------------------------------------------------------------------------------------------------------------------------------------------------------------------------|
| 1.  | (Online or Internet or Web-based or Computer or e-therapy or Digital).mp. [mp=title, abstract, heading word, table of contents, key concepts, original title, tests & measures, mesh word] |
| 2.  | limit 1 to english language                                                                                                                                                                |
| 3.  | blended.mp. [mp=title, abstract, heading word, table of contents, key concepts, original title, tests & measures, mesh word]                                                               |
| 4.  | limit 3 to english language                                                                                                                                                                |
| 5.  | (treatment or therapy or care).mp. [mp=title, abstract, heading word, table of contents, key concepts, original title, tests & measures, mesh word]                                        |
| 6.  | limit 5 to english language                                                                                                                                                                |
| 7.  | ("psychological distress" or "psychological disease").mp. [mp=title, abstract, heading word, table of contents, key concepts, original title, tests & measures, mesh word]                 |
| 8.  | limit 7 to english language                                                                                                                                                                |
| 9.  | 2 and 6 and 8                                                                                                                                                                              |
| 10. | 4 and 6 and 8                                                                                                                                                                              |
| 11. | 9 or 10                                                                                                                                                                                    |
| 12. | limit 11 to (english language and english and (adult <18 to 64 years> or aged <65+ years>) and "humans only (removes records about animals)")                                              |
| 13. | limit 12 to yr="2021 -Current"                                                                                                                                                             |
| 14. | limit 13 to yr="2022 -Current"                                                                                                                                                             |

## MEDLINE

| Set | Search Statement                                                                                                                                                                                                                                                                                                                                                                                                                                                                                                                                                                                                                                                                                                                                                                                                                                                                                                                                                                                                                                                                                                   |
|-----|--------------------------------------------------------------------------------------------------------------------------------------------------------------------------------------------------------------------------------------------------------------------------------------------------------------------------------------------------------------------------------------------------------------------------------------------------------------------------------------------------------------------------------------------------------------------------------------------------------------------------------------------------------------------------------------------------------------------------------------------------------------------------------------------------------------------------------------------------------------------------------------------------------------------------------------------------------------------------------------------------------------------------------------------------------------------------------------------------------------------|
| 1.  | (Online or Internet or Web-based or Computer or e-therapy or Digital).mp. [mp=title, abstract, heading word, table of contents, key concepts, original title, tests & measures, mesh word]                                                                                                                                                                                                                                                                                                                                                                                                                                                                                                                                                                                                                                                                                                                                                                                                                                                                                                                         |
| 2.  | limit 1 to english language                                                                                                                                                                                                                                                                                                                                                                                                                                                                                                                                                                                                                                                                                                                                                                                                                                                                                                                                                                                                                                                                                        |
| 3.  | blended.mp. [mp=title, abstract, heading word, table of contents, key concepts, original title, tests & measures, mesh word]                                                                                                                                                                                                                                                                                                                                                                                                                                                                                                                                                                                                                                                                                                                                                                                                                                                                                                                                                                                       |
| 4.  | limit 3 to english language                                                                                                                                                                                                                                                                                                                                                                                                                                                                                                                                                                                                                                                                                                                                                                                                                                                                                                                                                                                                                                                                                        |
| 5.  | (treatment or therapy or care).mp. [mp=title, abstract, heading word, table of contents, key concepts, original title, tests & measures, mesh word]                                                                                                                                                                                                                                                                                                                                                                                                                                                                                                                                                                                                                                                                                                                                                                                                                                                                                                                                                                |
| 6.  | limit 5 to english language                                                                                                                                                                                                                                                                                                                                                                                                                                                                                                                                                                                                                                                                                                                                                                                                                                                                                                                                                                                                                                                                                        |
| 7.  | psychological.mp. [mp=title, abstract, heading word, table of contents, key concepts, original title, tests & measures, mesh word]                                                                                                                                                                                                                                                                                                                                                                                                                                                                                                                                                                                                                                                                                                                                                                                                                                                                                                                                                                                 |
| 8.  | limit 7 to english language                                                                                                                                                                                                                                                                                                                                                                                                                                                                                                                                                                                                                                                                                                                                                                                                                                                                                                                                                                                                                                                                                        |
| 9.  | (distress or disease).mp. [mp=title, abstract, heading word, table of contents, key concepts, original title, tests & measures, mesh word]                                                                                                                                                                                                                                                                                                                                                                                                                                                                                                                                                                                                                                                                                                                                                                                                                                                                                                                                                                         |
| 10. | limit 9 to english language                                                                                                                                                                                                                                                                                                                                                                                                                                                                                                                                                                                                                                                                                                                                                                                                                                                                                                                                                                                                                                                                                        |
| 11. | 2 and 6 and 8 and 10                                                                                                                                                                                                                                                                                                                                                                                                                                                                                                                                                                                                                                                                                                                                                                                                                                                                                                                                                                                                                                                                                               |
| 12. | 4 and 6 and 8 and 10                                                                                                                                                                                                                                                                                                                                                                                                                                                                                                                                                                                                                                                                                                                                                                                                                                                                                                                                                                                                                                                                                               |
| 13. | 11 or 12                                                                                                                                                                                                                                                                                                                                                                                                                                                                                                                                                                                                                                                                                                                                                                                                                                                                                                                                                                                                                                                                                                           |
| 14. | limit 13 to (english language and ("young adult (19 to 24 years)" or "adult (19 to 44 years)" or "young adult and adult (19-24 and 19-44)" or "middle age (45 to 64 years)" or "middle aged (45 plus years)" or "all aged (65 and over)" or "aged (80 and over)") and english and (adaptive clinical trial or classical article or clinical study or clinical trial, all or clinical trial, phase i or clinical trial, phase ii or clinical trial, phase iii or clinical trial, phase iv or clinical trial protocol or clinical trial protocols as topic or clinical trial or comparative study or controlled clinical trial or dataset or english abstract or equivalence trial or evaluation study or government publication or guideline or journal article or meta analysis or multicenter study or observational study or practice guideline or pragmatic clinical trial or randomized controlled trial or research support, nih, extramural or research support, nih, intramural or "review" or "scientific integrity review" or "systematic review" or technical report or twin study or validation study)) |
| 15. | limit 14 to yr="2021 -Current"                                                                                                                                                                                                                                                                                                                                                                                                                                                                                                                                                                                                                                                                                                                                                                                                                                                                                                                                                                                                                                                                                     |
| 16. | limit 15 to yr="2022 -Current"                                                                                                                                                                                                                                                                                                                                                                                                                                                                                                                                                                                                                                                                                                                                                                                                                                                                                                                                                                                                                                                                                     |

## PROQUEST

|                             |                                                                                                                                                                                                                                                                                                                                                                                                                                                                                                                                                                                                                                     |
|-----------------------------|-------------------------------------------------------------------------------------------------------------------------------------------------------------------------------------------------------------------------------------------------------------------------------------------------------------------------------------------------------------------------------------------------------------------------------------------------------------------------------------------------------------------------------------------------------------------------------------------------------------------------------------|
| <input type="checkbox"/> 10 | <p><b>Name:</b> PROQUEST May22-Mar23 <a href="#">Edit name</a></p> <p><b>Searched for:</b> noft(blended OR (online AND "face to face")) AND noft(disorder OR distress) AND psycholog* AND la.exact("English") AND pd(&gt;20220501)</p> <p><b>Limited by:</b> Date: After 01 May 2022<br/>Language: English</p> <p><b>Databases:</b> ProQuest Central</p> <p><b>Notes:</b> <a href="#">Add notes</a></p> <p><b>Saved:</b> 17 February 2023</p> <p><a href="#">Modify Search</a> <input checked="" type="checkbox"/> <a href="#">Delete</a> <a href="#">Create alert</a> <a href="#">Create RSS feed</a> <a href="#">Get link</a></p> |
|-----------------------------|-------------------------------------------------------------------------------------------------------------------------------------------------------------------------------------------------------------------------------------------------------------------------------------------------------------------------------------------------------------------------------------------------------------------------------------------------------------------------------------------------------------------------------------------------------------------------------------------------------------------------------------|

## PSYCHINFO

| Set | Search Statement                                                                                                                                                                           |
|-----|--------------------------------------------------------------------------------------------------------------------------------------------------------------------------------------------|
| 1.  | (Online or Internet or Web-based or Computer or e-therapy or Digital).mp. [mp=title, abstract, heading word, table of contents, key concepts, original title, tests & measures, mesh word] |
| 2.  | limit 1 to english language                                                                                                                                                                |
| 3.  | blended.mp. [mp=title, abstract, heading word, table of contents, key concepts, original title, tests & measures, mesh word]                                                               |
| 4.  | limit 3 to english language                                                                                                                                                                |
| 5.  | (treatment or therapy or care).mp. [mp=title, abstract, heading word, table of contents, key concepts, original title, tests & measures, mesh word]                                        |
| 6.  | limit 5 to english language                                                                                                                                                                |
| 7.  | psychological.mp. [mp=title, abstract, heading word, table of contents, key concepts, original title, tests & measures, mesh word]                                                         |
| 8.  | limit 7 to english language                                                                                                                                                                |
| 9.  | (distress or disease).mp. [mp=title, abstract, heading word, table of contents, key concepts, original title, tests & measures, mesh word]                                                 |
| 10. | limit 9 to english language                                                                                                                                                                |
| 11. | 2 and 6 and 8 and 10                                                                                                                                                                       |
| 12. | 4 and 6                                                                                                                                                                                    |
| 13. | 11 or 12                                                                                                                                                                                   |
| 14. | limit 13 to yr="2021 -Current"                                                                                                                                                             |
| 15. | limit 14 to yr="2022 -Current"                                                                                                                                                             |
