# Supplementary material for: Blended Psychological Therapy for the Treatment of Psychological Disorders in Adult Patients: Systematic Review and Meta-Analysis
Source: PubMed Central journal article supplement (PMC11558224; doi:10.2196/49660), 2024-10-29
Supplement: ijmr_v13i1e49660_app6.pdf [file ijmr_v13i1e49660_app6.pdf]

## Meta-analysis – BT vs Control Groups

### 1.1 Depression treatment outcomes – BT vs Control groups

- Stats, ordered by effect size (the more negative, the larger the effect)

| <u>Studyname</u>       | <u>Statistics for each study</u> |          |             |             |         |         | <u>Weight (Random)</u> |                 | <u>Residual (Random)</u> |              |              |
|------------------------|----------------------------------|----------|-------------|-------------|---------|---------|------------------------|-----------------|--------------------------|--------------|--------------|
|                        | Standard error                   | Variance | Upper limit | Lower limit | Z-Value | p-Value | Relative weight        | Relative weight | Std Residual             | Std Residual | Std Residual |
| Nakao et al, 2018      | 0.436                            | 0.190    | -1.835      | -3.545      | -6.164  | 0.000   | 9.17                   |                 | -1.97                    |              | 12.000       |
| Askjer et al 2021      | 0.292                            | 0.085    | -1.613      | -2.757      | -7.487  | 0.000   | 10.74                  |                 | -1.47                    |              | 12.000       |
| Høifødt et al, 2013    | 0.220                            | 0.049    | -1.082      | -1.946      | -6.870  | 0.000   | 11.42                  |                 | -0.58                    |              | 7.000        |
| van de Wal et al 2017  | 0.229                            | 0.052    | -0.653      | -1.550      | -4.813  | 0.000   | 11.35                  |                 | -0.00                    |              | 12.000       |
| Romijn G, et al., 2021 | 0.243                            | 0.059    | -0.471      | -1.425      | -3.898  | 0.000   | 11.22                  |                 | 0.21                     |              | 15.000       |
| Kooistra et al 2019    | 0.242                            | 0.059    | -0.459      | -1.409      | -3.856  | 0.000   | 11.22                  |                 | 0.23                     |              | 10.000       |
| Berger et al, 2018     | 0.250                            | 0.062    | -0.259      | -1.238      | -2.999  | 0.003   | 11.15                  |                 | 0.48                     |              | 12.000       |
| Thase et al. 2018      | 0.162                            | 0.026    | 0.101       | -0.532      | -1.334  | 0.182   | 11.88                  |                 | 1.26                     |              | 16.000       |
| Bisson et al, 2022     | 0.167                            | 0.028    | 0.327       | -0.327      | 0.000   | 1.000   | 11.85                  |                 | 1.57                     |              | 16.000       |
| Pooled                 | 0.074                            | 0.006    | -0.651      | -0.943      | -10.722 | 0.000   |                        |                 |                          |              |              |

## 1.2 Depression treatment outcomes – BT vs Control groups

- Forest Plot, ordered by effect size (the more negative, the larger the effect)

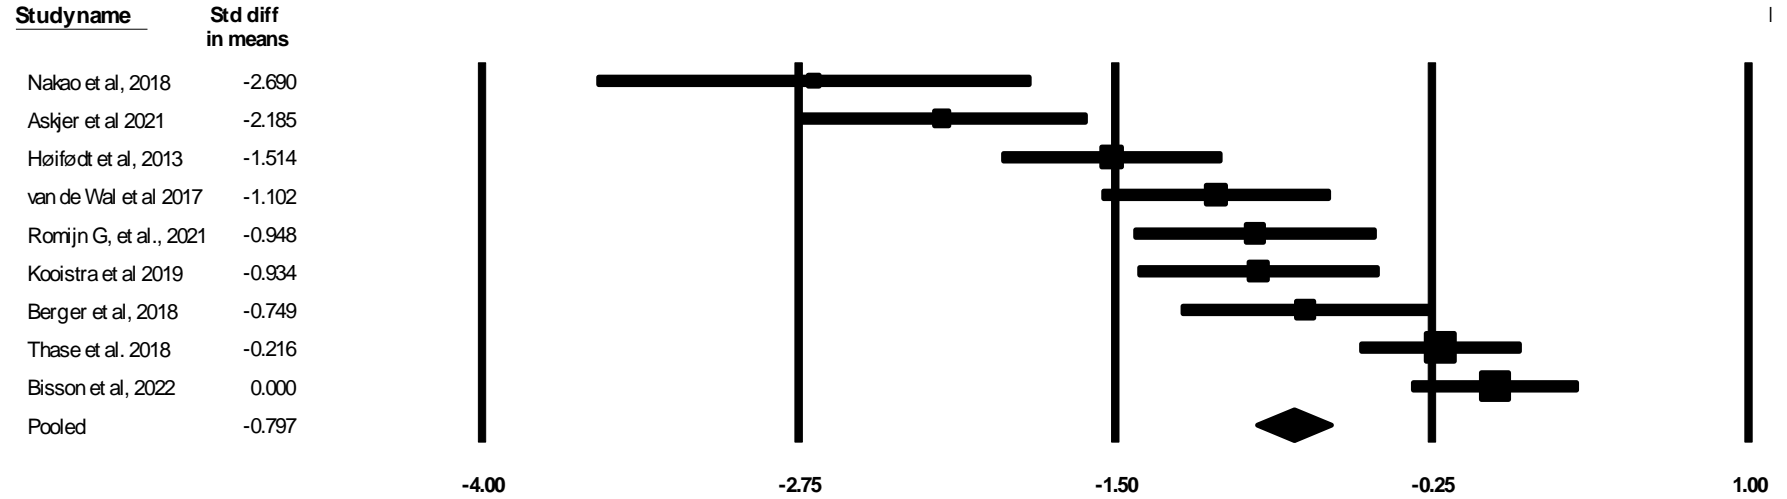

## 2 Depression treatment outcomes – BT vs Control groups – Funnel Plot

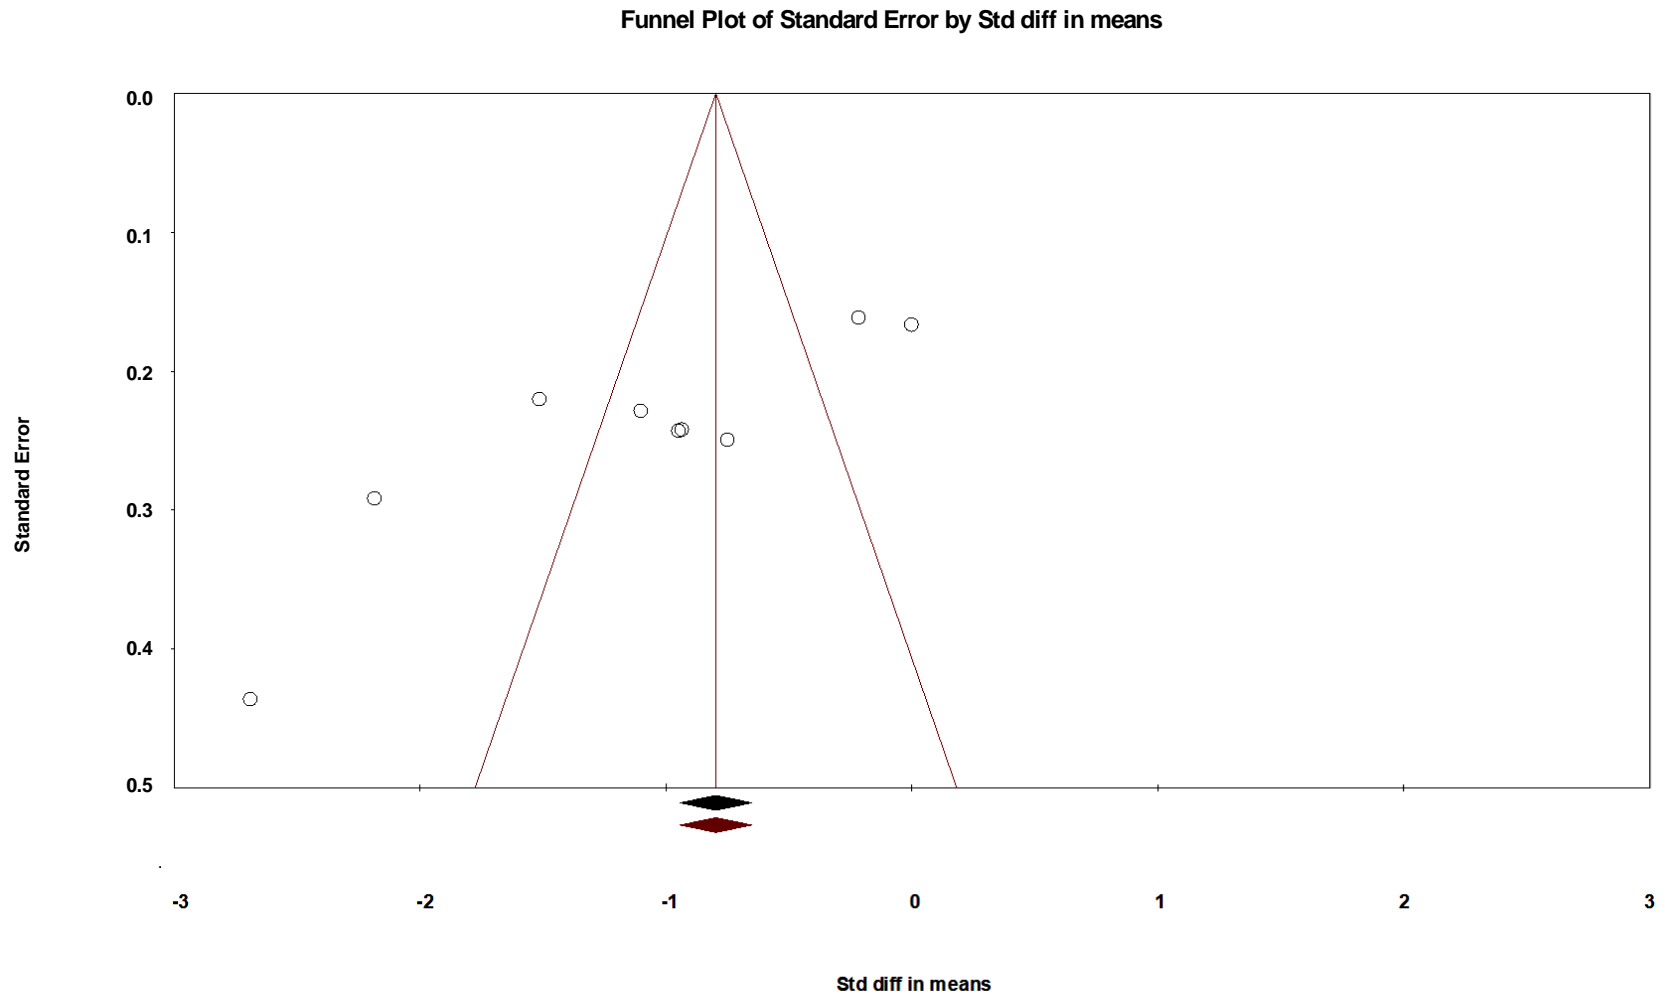

### 3.1 Anxiety treatment outcomes – BT vs Control groups

- Stats; ordered by author name (alphabetically)

| <u>Study name</u>      | <u>Statistics for each study</u> |                   |          |                |                |         |         |
|------------------------|----------------------------------|-------------------|----------|----------------|----------------|---------|---------|
|                        | Std diff<br>in means             | Standard<br>error | Variance | Lower<br>limit | Upper<br>limit | Z-Value | p-Value |
| Berger et al, 2018     | -0.116                           | 0.242             | 0.058    | -0.589         | 0.358          | -0.479  | 0.632   |
| Bisson et al, 2022     | -0.041                           | 0.168             | 0.028    | -0.371         | 0.288          | -0.246  | 0.806   |
| Høifødt et al, 2013    | -0.101                           | 0.194             | 0.038    | -0.482         | 0.280          | -0.520  | 0.603   |
| Romijn G, et al., 2021 | -0.110                           | 0.230             | 0.053    | -0.560         | 0.341          | -0.477  | 0.633   |
| vandeWâl et al 2017    | -0.110                           | 0.230             | 0.053    | -0.560         | 0.341          | -0.477  | 0.633   |
| Pooled                 | -0.318                           | 0.215             | 0.046    | -0.738         | 0.103          | -1.481  | 0.139   |
| Prediction Interval    | -0.126                           | 0.091             | 0.008    | -0.305         | 0.053          | -1.380  | 0.167   |

### 3.2 Anxiety treatment outcomes – BT vs Control groups

- Forest Plot; ordered by author name (alphabetically)

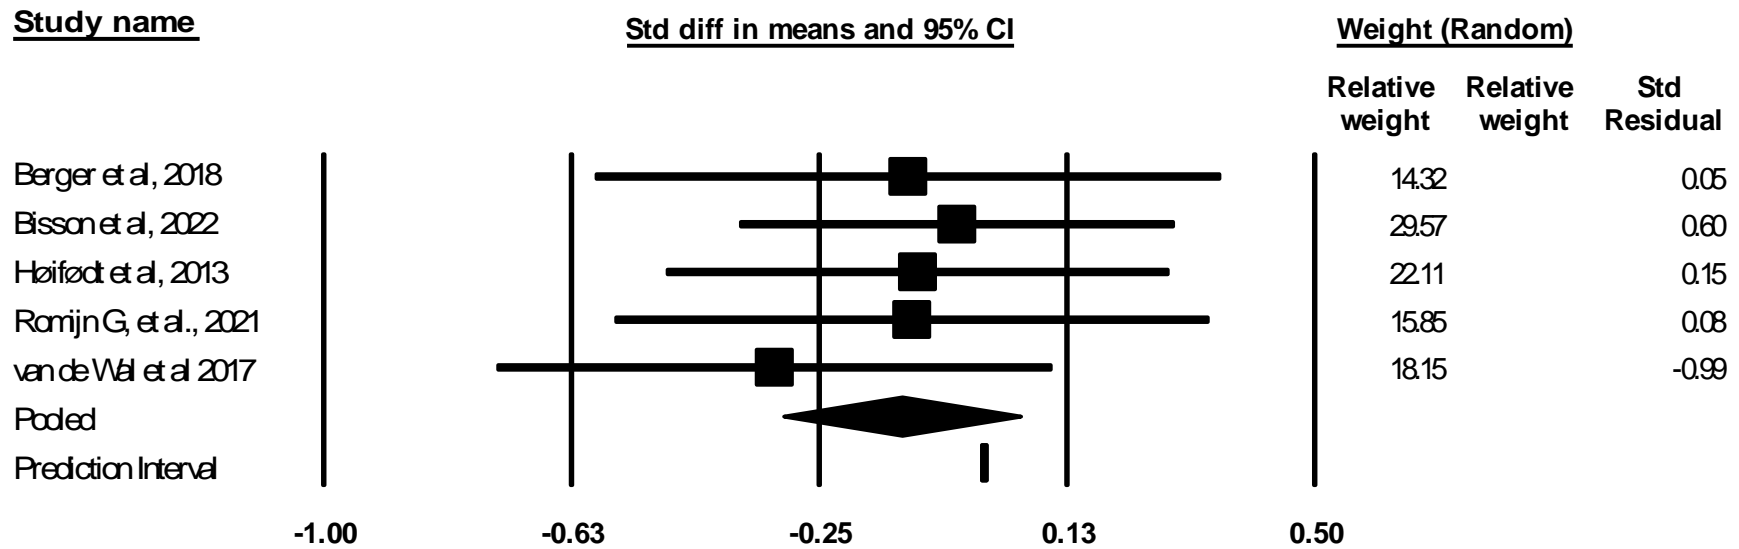

4. Anxiety treatment outcomes – BT vs Control groups – Funnel Plot

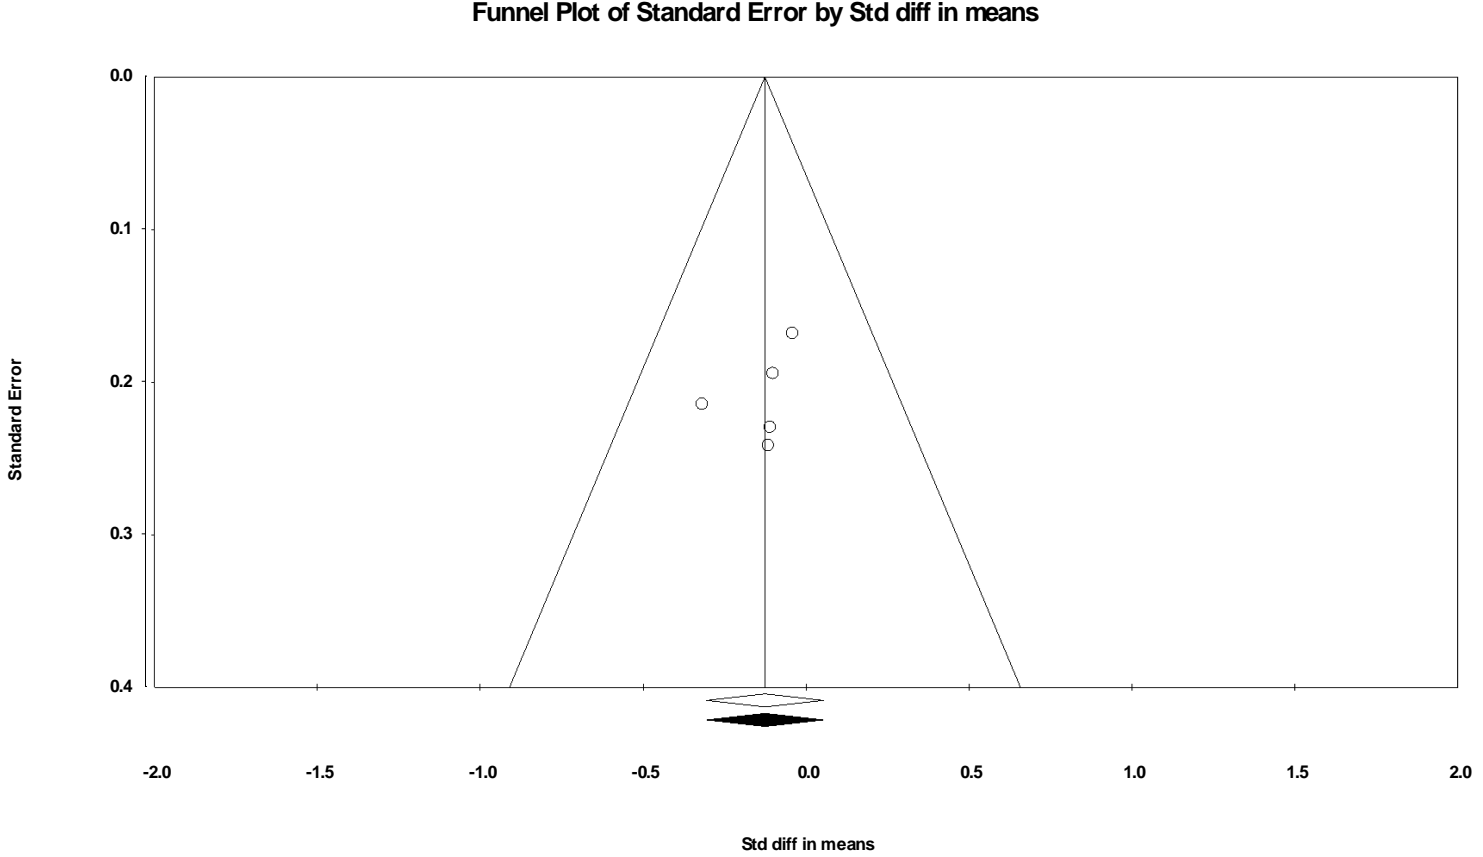

## Subgroup Meta-analysis – BT structure vs effect size (ES) outcomes

### 5. Depression - Stats - ES per design; ordered by design (core vs supplementary), then by effect size (the more negative, the larger the effect)

| Study                  | Mean - F2F | Mean - Online | Group by      | Model    | Statistics per study |                |          |             |             |         |         |
|------------------------|------------|---------------|---------------|----------|----------------------|----------------|----------|-------------|-------------|---------|---------|
|                        |            |               |               |          | Std diff in means    | Standard error | Variance | Upper limit | Lower limit | Z-Value | p-Value |
| Vernmark et al, 2019   | 4          | 10            | Core          | Random   | -0.81                | 1.97E-02       | 3.89E-04 | -0.77       | -0.84       | -40.90  | 0.00    |
| Høifødt et al, 2013    | 7.2        | 3.8           | Core          |          | -0.67                | 2.83E-02       | 8.03E-04 | -0.62       | -0.73       | -23.81  | 0.00    |
| Nakao et al, 2018      | 11.65      | 11.65         | Core          |          | -0.67                | 2.92E-02       | 8.55E-04 | -0.61       | -0.72       | -22.75  | 0.00    |
| Witlox et al, 2021     | 3.5        | nd            | Core          |          | -0.65                | 4.27E-02       | 1.82E-03 | -0.57       | -0.73       | -15.24  | 0.00    |
| Romijn G, et al., 2021 | 6.7        | 6             | Core          |          | -0.61                | 3.12E-02       | 9.75E-04 | -0.55       | -0.67       | -19.43  | 0.00    |
| Thase et al. 2018      | 11         | 8.1           | Core          |          | -0.51                | 1.21E-02       | 1.47E-04 | -0.48       | -0.53       | -41.94  | 0.00    |
| Askjer et al 2021      | 5          | 4             | Core          |          | -0.45                | 0.02887        | 8.34E-04 | -0.39       | -0.51       | -15.64  | 0.00    |
| Kenter et al. 2013     | nd         | 5             | Core          |          | -0.44                | 1.41E-02       | 1.99E-04 | -0.41       | -0.47       | -31.13  | 0.00    |
| Kok et al., 2014       | nd         | nd            | Core          |          | -0.41                | 2.32E-02       | 5.38E-04 | -0.37       | -0.46       | -17.86  | 0.00    |
| Mol et al, 2018        | 7.1        | 6.3           | Core          |          | -0.14                | 9.47E-03       | 8.97E-05 | -0.12       | -0.16       | -14.43  | 0.00    |
|                        |            |               | Core          | Pooled   | -0.53                | 7.71E-02       | 5.94E-03 | -0.38       | -0.69       | -6.94   | 0.00    |
|                        |            |               | Core          | Pred Int | -0.53                |                |          | 0.05        | -1.12       |         |         |
| Bisson et al, 2022     | 5          | 8             | Supplementary |          | -1.18                | 3.37E-02       | 1.13E-03 | -1.12       | -1.25       | -35.13  | 0.00    |
| Lungu et al, 2020      | 5.2        | nd            | Supplementary |          | -1.07                | 2.20E-02       | 4.82E-04 | -1.03       | -1.11       | -48.79  | 0.00    |
| Kooistra et al 2016    | 7.11       | 8.6           | Supplementary |          | -1.03                | 8.26E-02       | 6.82E-03 | -0.87       | -1.20       | -12.53  | 0.00    |
| Kooistra et al 2019    | 10         | 9.6           | Supplementary |          | -1.01                | 2.57E-02       | 6.63E-04 | -0.96       | -1.06       | -39.21  | 0.00    |
| Ly et al, 2015         | 4          | nd            | Supplementary |          | -0.84                | 4.48E-02       | 2.00E-03 | -0.76       | -0.93       | -18.85  | 0.00    |
| Månsson et al, 2017    | nd         | 14            | Supplementary |          | -0.77                | 4.86E-02       | 2.36E-03 | -0.68       | -0.87       | -15.89  | 0.00    |
| Månsson et al, 2013    | 9          | nd            | Supplementary |          | -0.67                | 8.75E-02       | 7.66E-03 | -0.50       | -0.84       | -7.62   | 0.00    |
| Cloitre et al, 2022    | 7.5        | 7             | Supplementary |          | -0.55                | 3.19E-02       | 1.02E-03 | -0.49       | -0.61       | -17.30  | 0.00    |
| Kooistra et al 2020    | 11.1       | 10.3          | Supplementary |          | -0.49                | 5.12E-02       | 2.62E-03 | -0.39       | -0.59       | -9.53   | 0.00    |
| Berger et al, 2018     | 11.4       | 9             | Supplementary |          | -0.36                | 2.63E-02       | 6.90E-04 | -0.31       | -0.41       | -13.60  | 0.00    |
| van de Wal et al 2017  | 6          | nd            | Supplementary |          | -0.31                | 6.96E-02       | 4.84E-03 | -0.17       | -0.45       | -4.46   | 0.00    |
|                        |            |               | Supplementary | Pooled   | -0.75                | 0.098994       | 9.80E-03 | -0.56       | -0.95       | -7.62   | 0.00    |
|                        |            |               | Supplementary | Pred Int | -0.75                |                |          | 0.01        | -1.52       |         |         |
|                        |            |               | Overall       | Pooled   | -0.62                | 6.08E-02       | 3.70E-03 | -0.50       | -0.74       | -10.16  | 0.00    |
|                        |            |               | Overall       | Pred Int | -0.62                |                |          | 0.05        | -1.28       |         |         |

### 6. Depression - Forest Plot - ES per design, ordered by effect size (the more negative, the larger the effect)

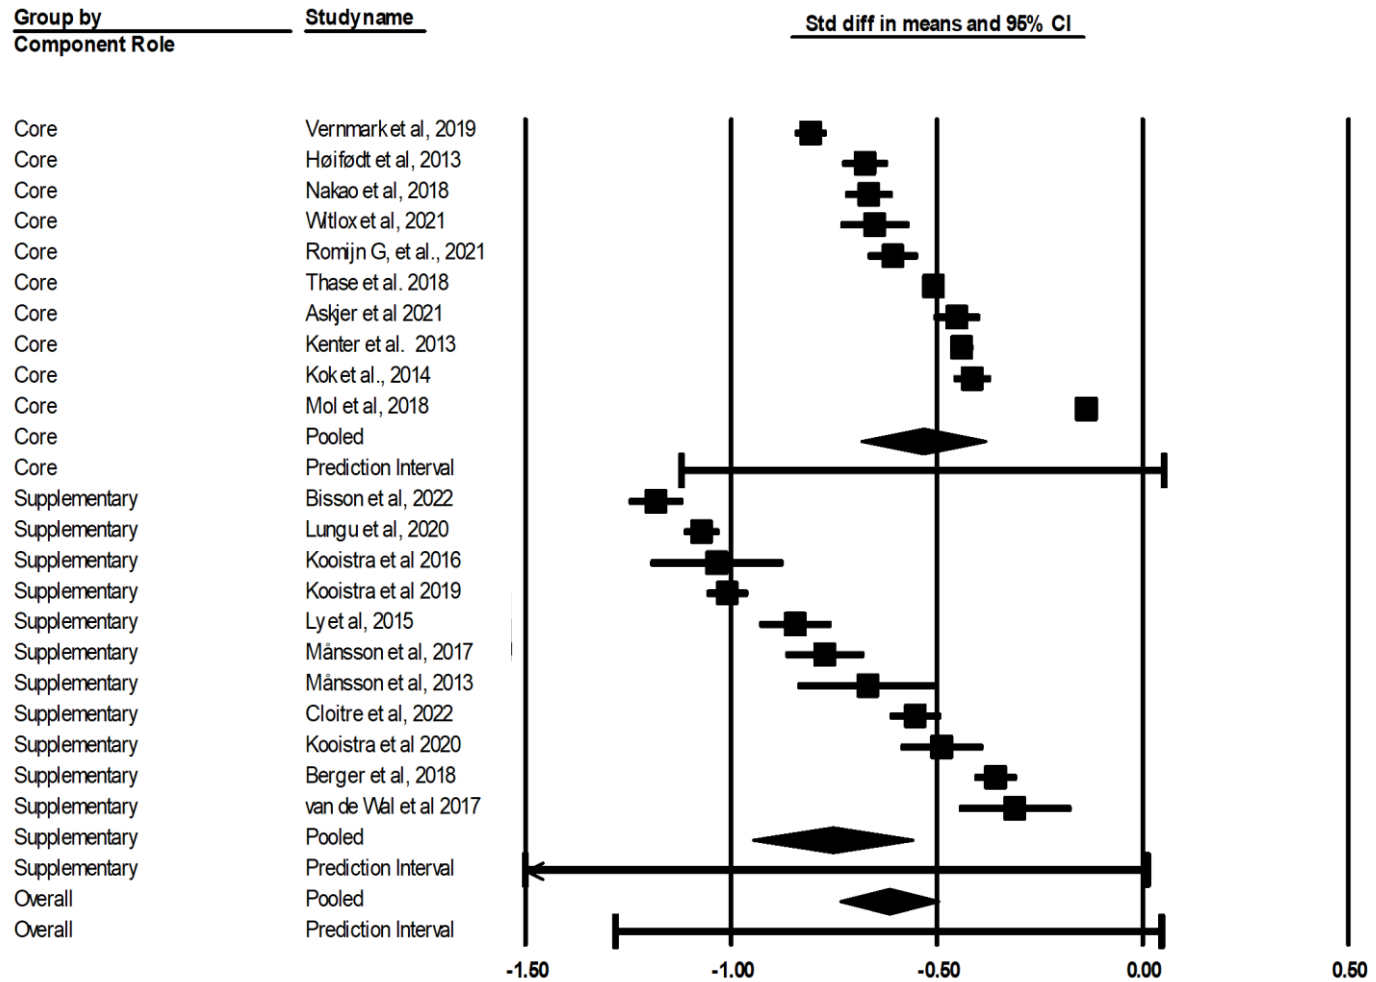



7. Depression - BT interventions - Funnel Plot

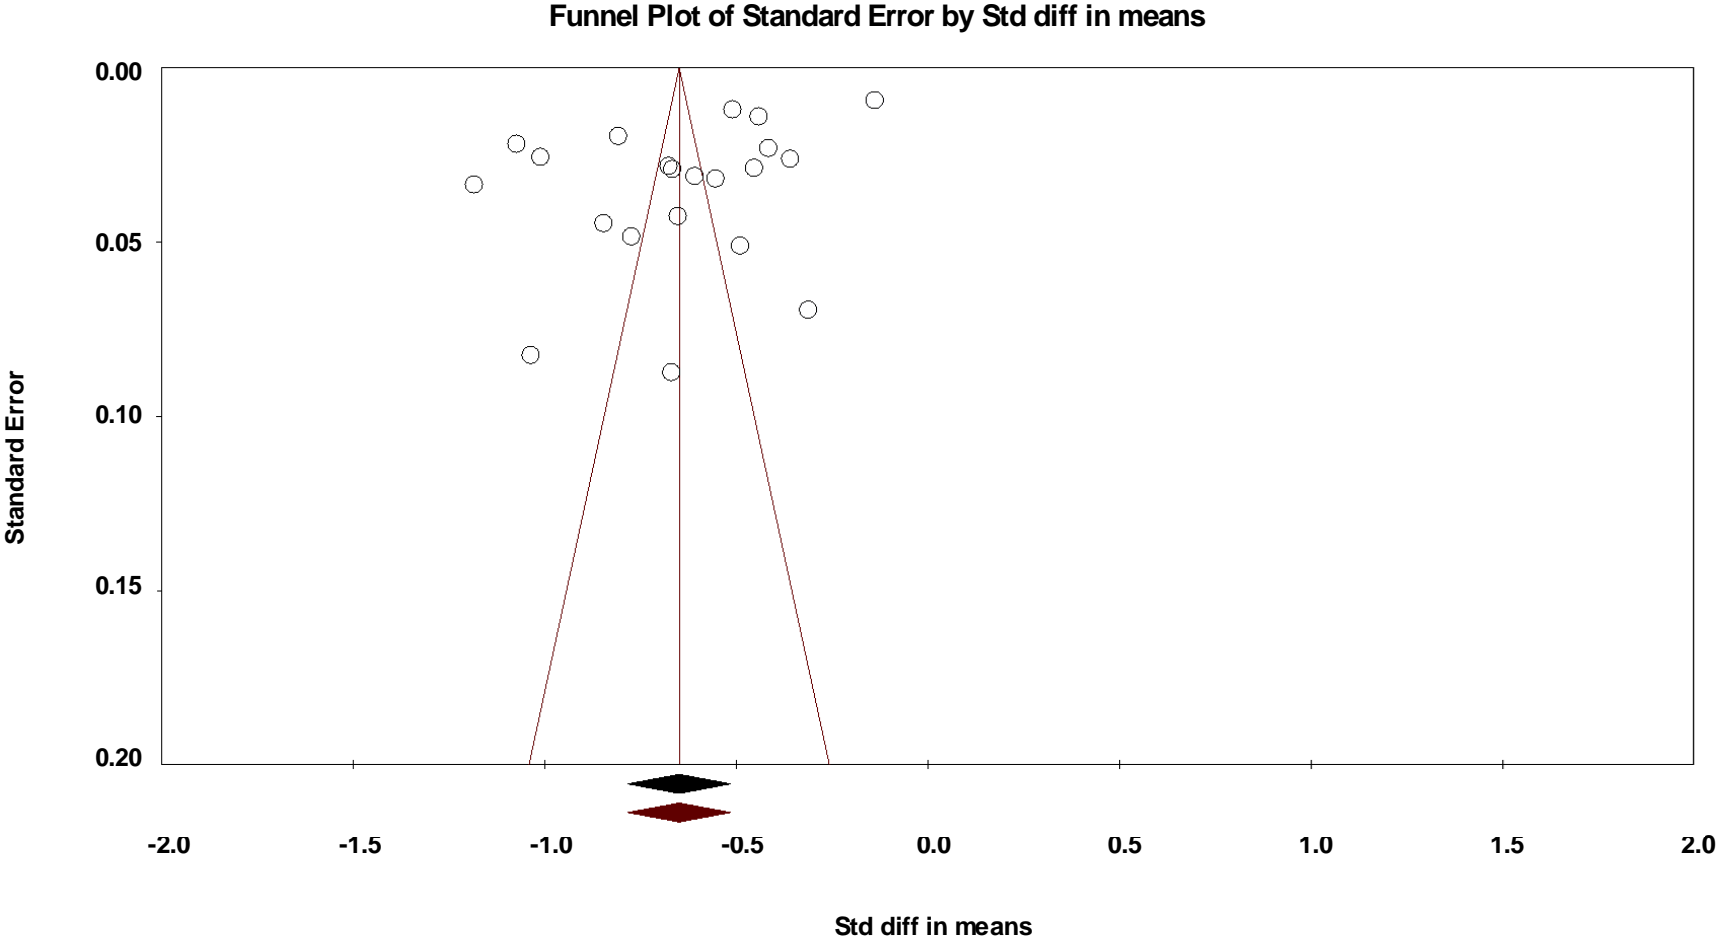

## 8. Anxiety - Stats per design

| <u>Component Role</u> | <u>Study name</u>      | <u>Statistics for each study</u> |                   |          |                |                |         |         |
|-----------------------|------------------------|----------------------------------|-------------------|----------|----------------|----------------|---------|---------|
|                       |                        | Std diff<br>in means             | Standard<br>error | Variance | Lower<br>limit | Upper<br>limit | Z-Value | p-Value |
| Core                  | Witlox et al, 2021     | -0.926                           | 0.078             | 0.006    | -1.079         | -0.772         | -11.814 | 0.000   |
| Core                  | Romijn G, et al., 2021 | -0.888                           | 0.075             | 0.006    | -1.034         | -0.741         | -11.888 | 0.000   |
| Core                  | Kenter et al. 2013     | -0.749                           | 0.045             | 0.002    | -0.837         | -0.661         | -16.678 | 0.000   |
| Core                  | Høifødt et al, 2013    | -0.335                           | 0.061             | 0.004    | -0.456         | -0.215         | -5.458  | 0.000   |
| Core                  | Kok et al., 2014       | -0.112                           | 0.015             | 0.000    | -0.141         | -0.084         | -7.686  | 0.000   |
|                       | Pooled                 | -0.599                           | 0.193             | 0.037    | -0.978         | -0.220         | -3.100  | 0.002   |
|                       | Prediction Interval    | -0.599                           |                   |          | -2.094         | 0.896          |         |         |
| Supplementary         | Bisson et al, 2022     | -1.427                           | 0.032             | 0.001    | -1.490         | -1.365         | -44.596 | 0.000   |
| Supplementary         | Månsson et al, 2013    | -1.275                           | 0.208             | 0.043    | -1.682         | -0.867         | -8.129  | 0.000   |
| Supplementary         | Lungu et al, 2020      | -1.266                           | 0.030             | 0.001    | -1.325         | -1.207         | -41.803 | 0.000   |
| Supplementary         | Kooistra et al 2016    | -0.860                           | 0.412             | 0.170    | -1.667         | -0.053         | -2.089  | 0.037   |
| Supplementary         | Ly et al, 2015         | -0.587                           | 0.060             | 0.004    | -0.705         | -0.469         | -9.755  | 0.000   |
| Supplementary         | van de Wal et al 2016  | -0.552                           | 0.062             | 0.004    | -0.673         | -0.430         | -8.901  | 0.000   |
| Supplementary         | Berger et al, 2018     | -0.537                           | 0.063             | 0.004    | -0.661         | -0.414         | -8.541  | 0.000   |
| Supplementary         | Månsson et al, 2017    | -0.485                           | 0.098             | 0.010    | -0.677         | -0.293         | -4.942  | 0.000   |
|                       | Pooled                 | -0.869                           | 0.159             | 0.025    | -1.180         | -0.557         | -5.472  | 0.000   |
|                       | Prediction Interval    | -0.869                           |                   |          | -1.981         | 0.244          |         |         |
|                       | Pooled                 | -0.760                           | 0.123             | 0.015    | -1.000         | -0.520         | -8.196  | 0.000   |
|                       | Prediction Interval    | -0.760                           |                   |          | -2.147         | 0.627          |         |         |

### 9. Anxiety - Forest Plot per design

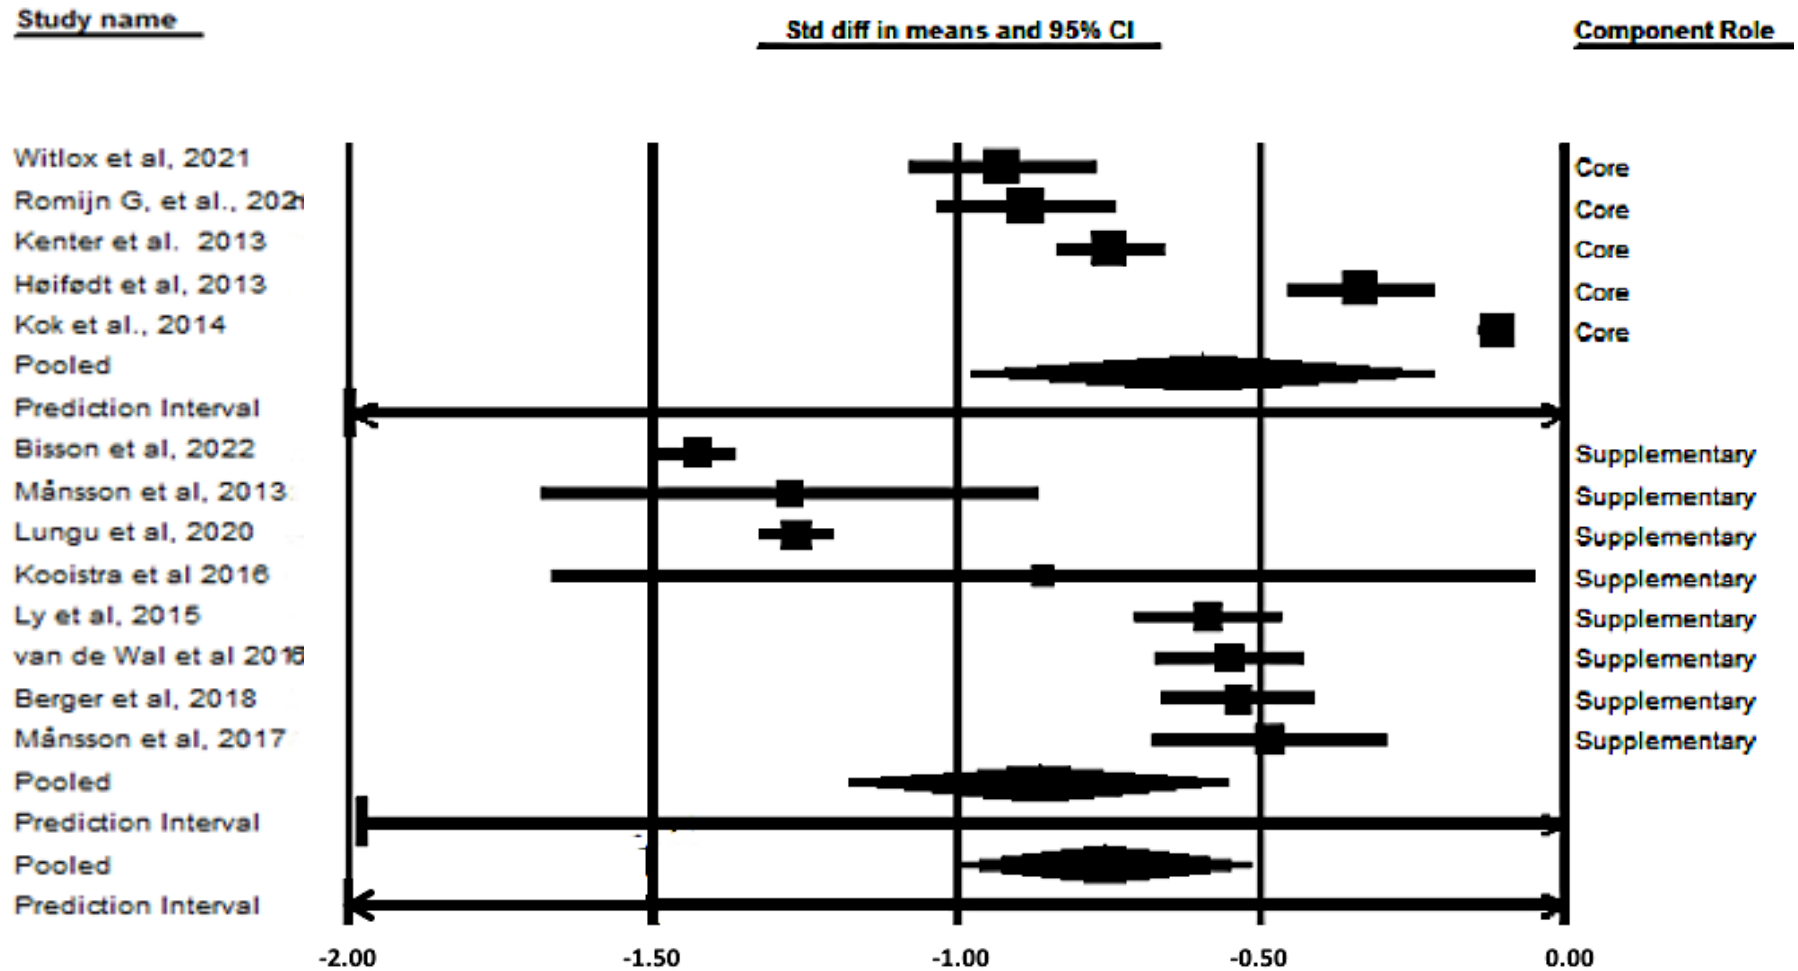

### 10. Anxiety - BT interventions - Funnel Plot

Funnel Plot of Standard Error by Std diff in means

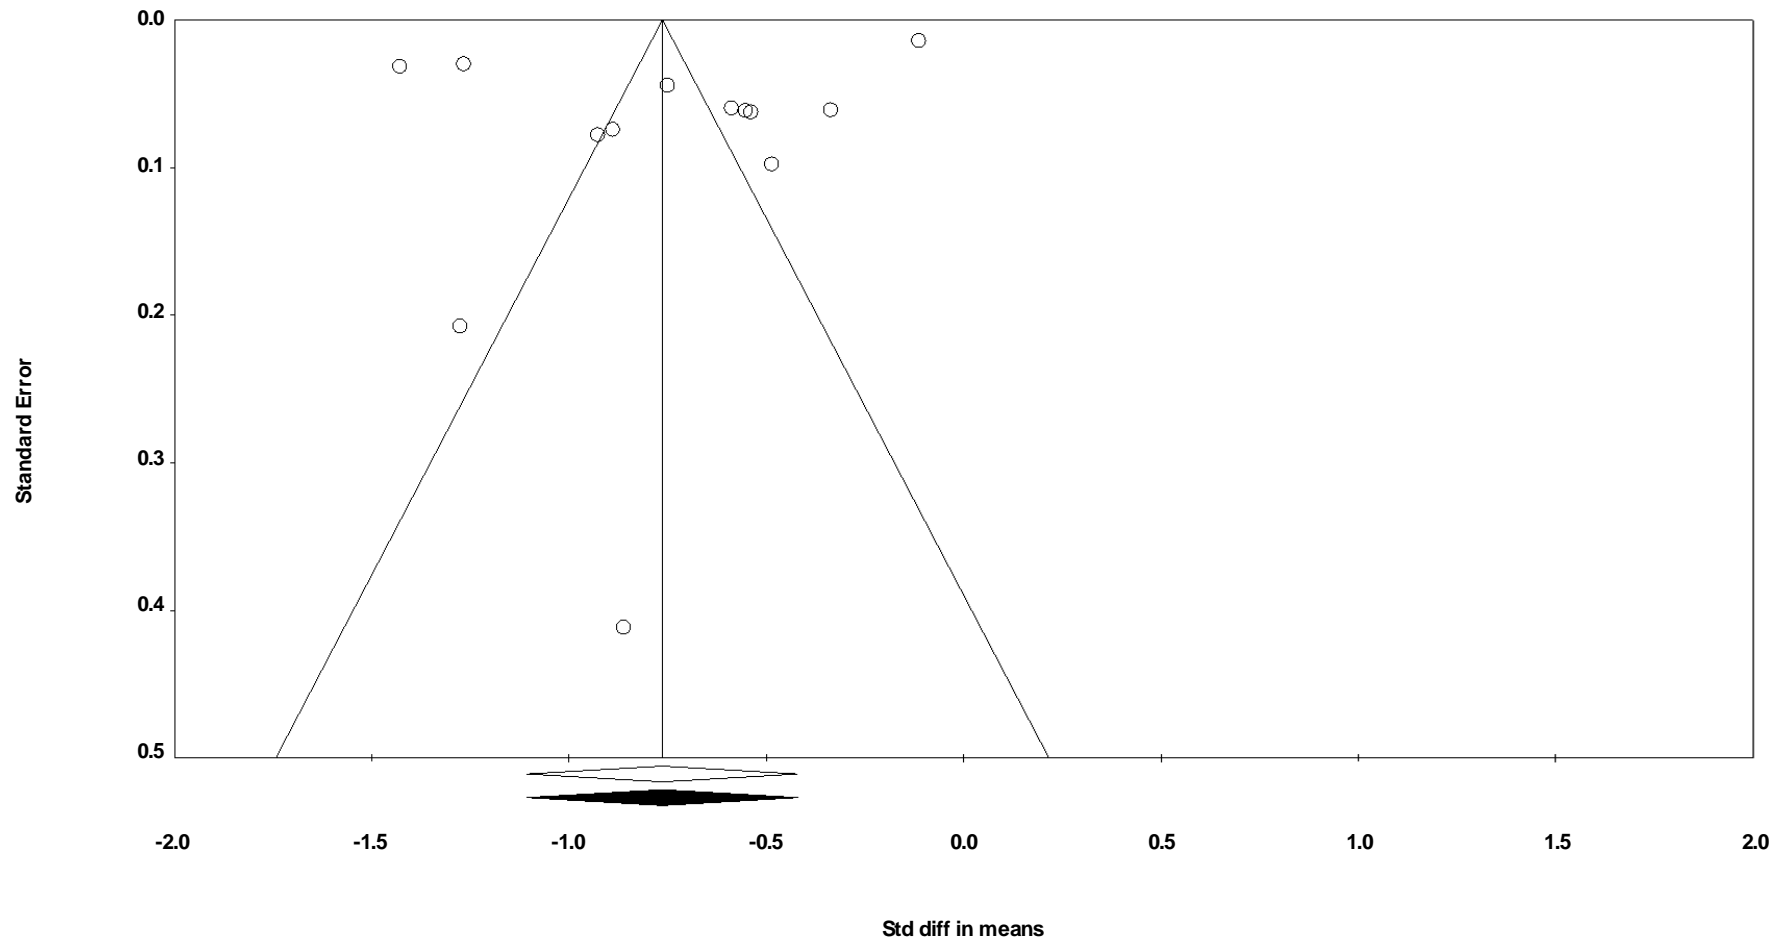

## REFERENCES

- Askjer, S., & Mathiasen, K. (2021). The working alliance in blended versus face-to-face cognitive therapy for depression: A secondary analysis of a randomized controlled trial. *Internet Interv*, 25, 100404. <https://doi.org/10.1016/j.invent.2021.100404>
- Berger, T., Krieger, T., Sude, K., Meyer, B., & Maercker, A. (2018). Evaluating an e-mental health program ("deprexis") as adjunctive treatment tool in psychotherapy for depression: Results of a pragmatic randomized controlled trial. *J Affect Disord*, 227, 455-462. <https://doi.org/10.1016/j.jad.2017.11.021>
- Bisson, J. I., Ariti, C., Cullen, K., Kitchiner, N., Lewis, C., Roberts, N. P., Simon, N., Smallman, K., Addison, K., Bell, V., Brookes-Howell, L., Cosgrove, S., Ehlers, A., Fitzsimmons, D., Foscarini-Craggs, P., Harris, S. R. S., Kelson, M., Lovell, K., McKenna, M., . . . Williams-Thomas, R. (2022). Guided, internet based, cognitive behavioural therapy for post-traumatic stress disorder: pragmatic, multicentre, randomised controlled non-inferiority trial (RAPID). *BMJ*, 377, e069405. <https://doi.org/10.1136/bmj-2021-069405>
- Cloitre, M., Amspoker, A. B., Fletcher, T. L., Hogan, J. B., Jackson, C., Jacobs, A., Shammet, R., Speicher, S., Wassef, M., & Lindsay, J. (2022). Comparing the Ratio of Therapist Support to Internet Sessions in a Blended Therapy Delivered to Trauma-Exposed Veterans: Quasi-experimental Comparison Study. *JMIR Ment Health*, 9(4), e33080. <https://doi.org/10.2196/33080>
- Hoifodt, R. S., Lillevoll, K. R., Griffiths, K. M., Wilsgaard, T., Eisemann, M., Waterloo, K., & Kolstrup, N. (2013). The clinical effectiveness of web-based cognitive behavioral therapy with face-to-face therapist support for depressed primary care patients: randomized controlled trial [Empirical Study; Interview; Quantitative Study]. *J Med Internet Res*, 15(8), e153. <https://doi.org/10.2196/jmir.2714>
- Kenter, R., Warmerdam, L., Brouwer-Dudokdewit, C., Cuijpers, P., & van Straten, A. (2013). Guided online treatment in routine mental health care: an observational study on uptake, drop-out and effects. *BMC Psychiatry*, 13, 43, Article 43. <https://doi.org/10.1186/1471-244X-13-43>
- Kok, R. N., van Straten, A., Beekman, A. T., & Cuijpers, P. (2014). Short-term effectiveness of web-based guided self-help for phobic outpatients: randomized controlled trial [Empirical Study; Interview; Quantitative Study; Treatment Outcome]. *J Med Internet Res*, 16(9), e226. <https://doi.org/10.2196/jmir.3429>
- Kooistra, L., Ruwaard, J., Wiersma, J., van Oppen, P., & Riper, H. (2020). Working Alliance in Blended Versus Face-to-Face Cognitive Behavioral Treatment for Patients with Depression in Specialized Mental Health Care. *J Clin Med*, 9(2), Article 347. <https://doi.org/10.3390/jcm9020347>
- Kooistra, L. C., Ruwaard, J., Wiersma, J. E., van Oppen, P., van der Vaart, R., van Gemert-Pijnen, J., & Riper, H. (2016). Development and initial evaluation of blended cognitive behavioural treatment for major depression in routine specialized mental health care. *Internet Interv*, 4, 61-71. <https://doi.org/10.1016/j.invent.2016.01.003>
- Kooistra, L. C., Wiersma, J. E., Ruwaard, J., Neijenhuijs, K., Lokkerbol, J., van Oppen, P., Smit, F., & Riper, H. (2019). Cost and Effectiveness of Blended Versus Standard Cognitive Behavioral Therapy for Outpatients With Depression in Routine Specialized Mental Health Care: Pilot Randomized Controlled Trial. *J Med Internet Res*, 21(10), e14261. <https://doi.org/10.2196/14261>

- Lungu, A., Jun, J. J., Azarmanesh, O., Leykin, Y., & Chen, C. E. (2020). Blended Care-Cognitive Behavioral Therapy for Depression and Anxiety in Real-World Settings: Pragmatic Retrospective Study. *J Med Internet Res*, 22(7), e18723, Article e18723. <https://doi.org/10.2196/18723>
- Ly, K. H., Topooco, N., Cederlund, H., Wallin, A., Bergstrom, J., Molander, O., Carlbring, P., & Andersson, G. (2015). Smartphone-Supported versus Full Behavioural Activation for Depression: A Randomised Controlled Trial. *PLoS ONE*, 10(5), e0126559, Article e0126559. <https://doi.org/10.1371/journal.pone.0126559>
- Mansson, K. N., Klintmalm, H., Nordqvist, R., & Andersson, G. (2017). Conventional Cognitive Behavioral Therapy Facilitated by an Internet-Based Support System: Feasibility Study at a Psychiatric Outpatient Clinic. *JMIR Res Protoc*, 6(8), e158. <https://doi.org/10.2196/resprot.6035>
- Mansson, K. N., Skagius Ruiz, E., Gervind, E., Dahlin, M., & Andersson, G. (2013). Development and initial evaluation of an Internet-based support system for face-to-face cognitive behavior therapy: a proof of concept study. *J Med Internet Res*, 15(12), e280. <https://doi.org/10.2196/jmir.3031>
- Mol, M., Dozeman, E., Provoost, S., van Schaik, A., Riper, H., & Smit, J. H. (2018). Behind the Scenes of Online Therapeutic Feedback in Blended Therapy for Depression: Mixed-Methods Observational Study. *J Med Internet Res*, 20(5), e174. <https://doi.org/10.2196/jmir.9890>
- Nakao, S., Nakagawa, A., Oguchi, Y., Mitsuda, D., Kato, N., Nakagawa, Y., Tamura, N., Kudo, Y., Abe, T., Hiyama, M., Iwashita, S., Ono, Y., & Mimura, M. (2018). Web-Based Cognitive Behavioral Therapy Blended With Face-to-Face Sessions for Major Depression: Randomized Controlled Trial. *J Med Internet Res*, 20(9), e10743. <https://doi.org/10.2196/10743>
- Romijn, G., Provoost, S., Batelaan, N., Koning, J., van Balkom, A., & Riper, H. (2021). Does it blend? Exploring therapist fidelity in blended CBT for anxiety disorders. *Internet Interv*, 25, 100418, Article 100418. <https://doi.org/10.1016/j.invent.2021.100418>
- Thase, M. E., Wright, J. H., Eells, T. D., Barrett, M. S., Wisniewski, S. R., Balasubramani, G. K., McCrone, P., & Brown, G. K. (2018). Improving the Efficiency of Psychotherapy for Depression: Computer-Assisted Versus Standard CBT. *Am J Psychiatry*, 175(3), 242-250. <https://doi.org/10.1176/appi.ajp.2017.17010089>
- van de Wal, M., Thewes, B., Gielissen, M., Speckens, A., & Prins, J. (2017). Efficacy of Blended Cognitive Behavior Therapy for High Fear of Recurrence in Breast, Prostate, and Colorectal Cancer Survivors: The SWORD Study, a Randomized Controlled Trial. *J Clin Oncol*, 35(19), 2173-2183. <https://doi.org/10.1200/JCO.2016.70.5301>
- Vernmark, K., Hesser, H., Topooco, N., Berger, T., Riper, H., Luuk, L., Backlund, L., Carlbring, P., & Andersson, G. (2019). Working alliance as a predictor of change in depression during blended cognitive behaviour therapy. *Cogn Behav Ther*, 48(4), 285-299. <https://doi.org/10.1080/16506073.2018.1533577>
- Witlox, M., Garnefski, N., Kraaij, V., de Waal, M. W. M., Smit, F., Bohlmeijer, E., & Spinhoven, P. (2021). Blended Acceptance and Commitment Therapy Versus Face-to-face Cognitive Behavioral Therapy for Older Adults With Anxiety Symptoms in Primary Care: Pragmatic Single-blind Cluster Randomized Trial. *J Med Internet Res*, 23(3), e24366, Article e24366. <https://doi.org/10.2196/24366>
